# Supplementary material for: Ultra-small subnano TiOx clusters as excellent cocatalysts for the photocatalytic degradation of tetracycline on plasmonic Ag/AgCl
Source: Royal Society of Chemistry journal article supplement (doi:10.1039/c9cy01876j), 2019-10-30
Supplement: c9cy01876j1.pdf [file c9cy01876j1.pdf]

*Supporting information:*

Ultra small subnano TiO<sub>x</sub> cluster as an excellent co-catalyst for photocatalytic degradation of tetracycline on plasmonic Ag/AgCl

Wenlu He,<sup>a</sup> Kaiwen Wang,<sup>b</sup> Zhu Zhu,<sup>b</sup> Hanjun Zou,<sup>c</sup> Kai Zhou,<sup>c</sup> Zhao Hu,<sup>d</sup> Youyu Duan,<sup>a</sup> Yajie Feng,<sup>a</sup> Liyong Gan,<sup>a</sup> Kangle Lv,<sup>d</sup> Cong Wang,<sup>\*b</sup> Xiaodong Han,<sup>\*b</sup> and Xiaoyuan Zhou<sup>\*a,c</sup>

<sup>[a]</sup>College of Physics, Chongqing University, Chongqing 401331, P. R. China

<sup>[b]</sup>Beijing Key Laboratory and Institute of Microstructure and Property of Advanced Materials, Beijing University of Technology, Beijing 100124, P. R. China

<sup>[c]</sup> Analytical and Testing Center, Chongqing University, Chongqing 401331, P. R. China

<sup>[d]</sup> College of Resources and Environmental Science, South-Central University for Nationalities, Wuhan 430074, P. R. China

\*Corresponding authors Emails:

smartswang@bjut.edu.cn (C. W); xdhan@bjut.edu.cn (X. H); xiaoyuan2013@cqu.edu.cn (X. Z).

**This file includes:**

**Fig. S1** (a) XRD patterns of TiO<sub>x</sub>@Ag/AgCl loaded with different concentrations of TiO<sub>x</sub> from 0.1 to 5 times of the as-prepared fresh sample and the pristine sample; (b) XRD patterns of the as-prepared fresh TiO<sub>x</sub>@Ag/AgCl and the used TiO<sub>x</sub>@AgCl after 10 cycles.

**Fig. S2** PL spectra of the as-prepared TiO<sub>x</sub>@Ag/AgCl, 0.1TiO<sub>x</sub>@Ag/AgCl and the synthesized Ag/AgCl.

**Fig. S3.** FTIR spectra of the as-prepared TiO<sub>x</sub>@Ag/AgCl and the synthesized Ag/AgCl

**Fig. S4** EIS nyquist plots of Ag/AgCl and TiO<sub>x</sub>@Ag/AgCl

**Fig. S5** Absorption spectrums of the degradation of TC with the presence of  $\text{TiO}_x@Ag/AgCl$ .

**Fig. S6** Dependence of the TC adsorption efficiency on the  $\text{TiO}_x@Ag/AgCl$  in the dark

**Fig. S7** HAADF images of  $\text{TiO}_x@Ag/AgCl$  exposed under different time of electron beam irradiation a) 0 s; b) 10 s; c) 20 s; d) 30 s; e) 40 s; f) 50 s.

**Fig. S8** Effect of different scavengers on photocatalytic degradation

**Fig. S9.** Effect of different scavengers on photocatalytic degradation ESR signals of  $\text{DMPO-O}_2\cdot^-$  and  $\text{DMPO-HO}\cdot$  of  $\text{TiO}_x@Ag/AgCl$ . scavengers on photocatalytic degradation.

**Fig. S10.** LC-MS analysis of TC and its intermediates in the photodegradation reaction

**Fig. S11.** Proposed possible pathways of photocatalytic degradation of TC

**Table. S1** EDX result of  $\text{TiO}_x@Ag/AgCl$

**Table. S2** Corresponding reaction rate constant  $k$  of TC of various catalyst

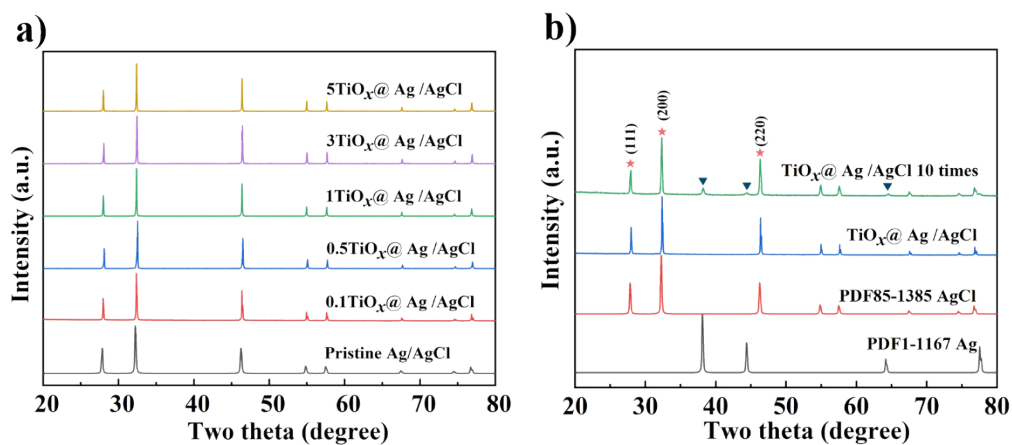

**Fig. S1.** (a) XRD patterns of  $\text{TiO}_x@ \text{Ag} / \text{AgCl}$  loaded with different concentrations of  $\text{TiO}_x$  from 0.1 to 5 times of the as-prepared fresh sample and the pristine sample. (b) XRD patterns of the as-prepared fresh  $\text{TiO}_x@ \text{Ag} / \text{AgCl}$  and the used  $\text{TiO}_x@ \text{Ag} / \text{AgCl}$  after 10 cycles.

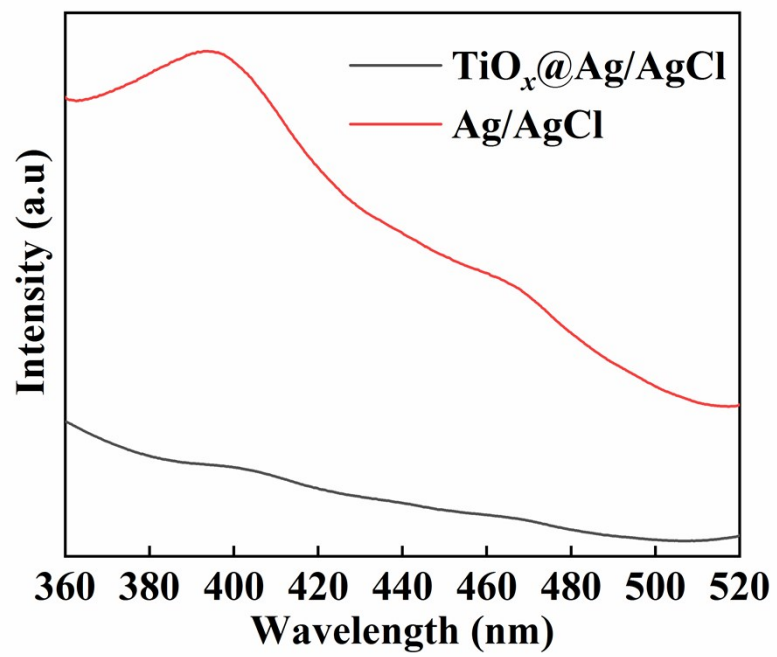

**Fig. S2.** PL spectra of  $\text{TiO}_x@Ag/AgCl$  and the synthesized  $Ag/AgCl$ .

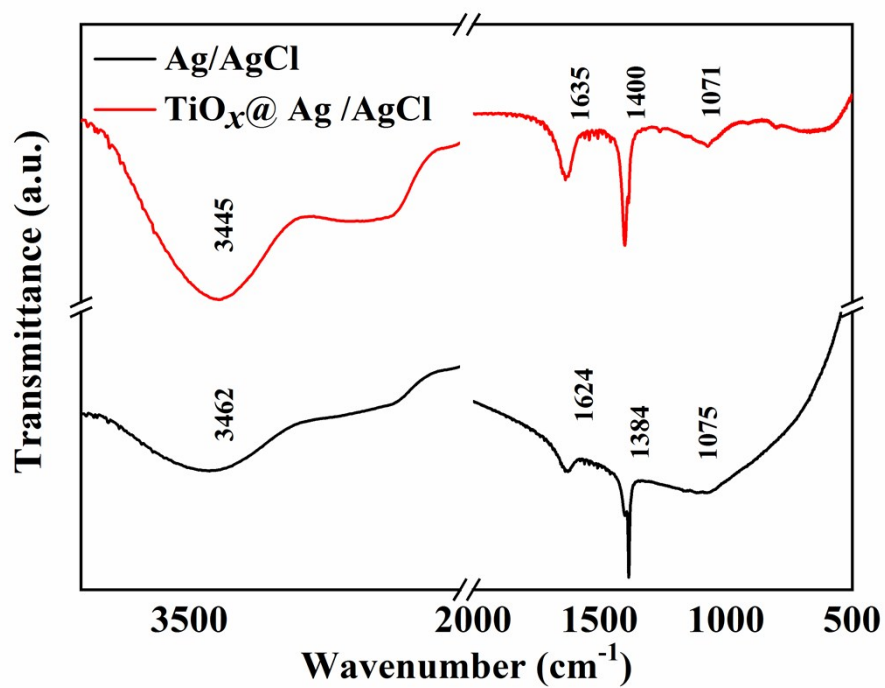

**Fig. S3.** FTIR spectra of the as-prepared TiO<sub>x</sub>@Ag/AgCl and the synthesized Ag/AgCl.

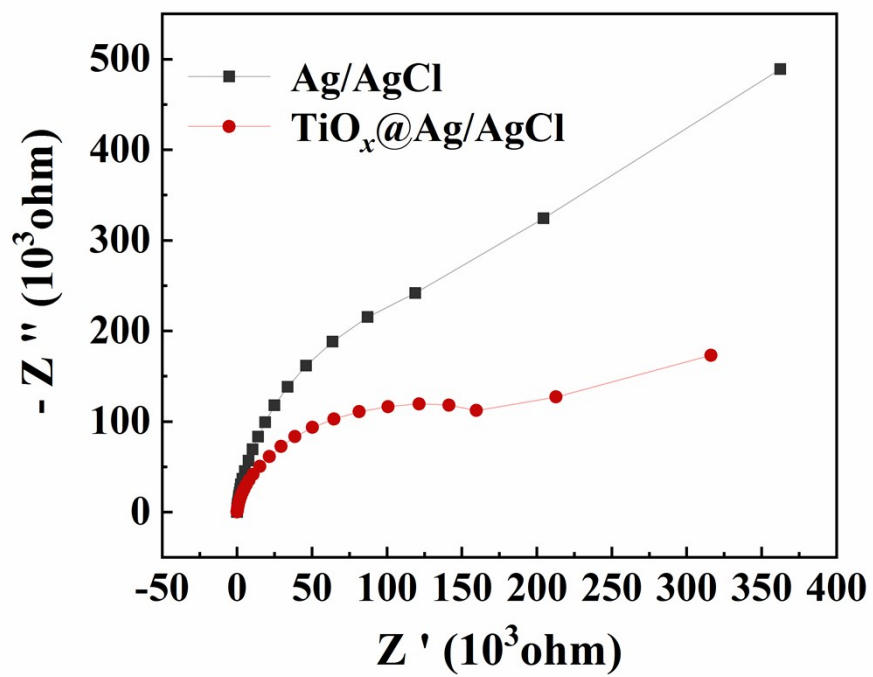

**Fig. S4.** EIS nyquist plots of Ag/AgCl and  $\text{TiO}_x@Ag/AgCl$  in 0.5 M  $\text{Na}_2\text{SO}_4$  aqueous solution in the dark.

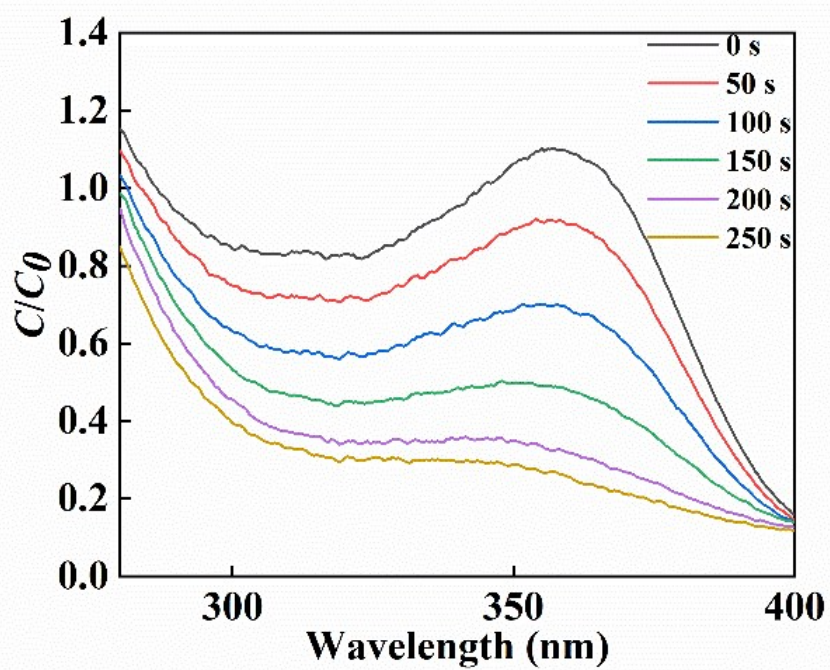

**Fig. S5.** Absorption spectrums of the degradation of TC with the presence of  $\text{TiO}_x@Ag/AgCl$ .

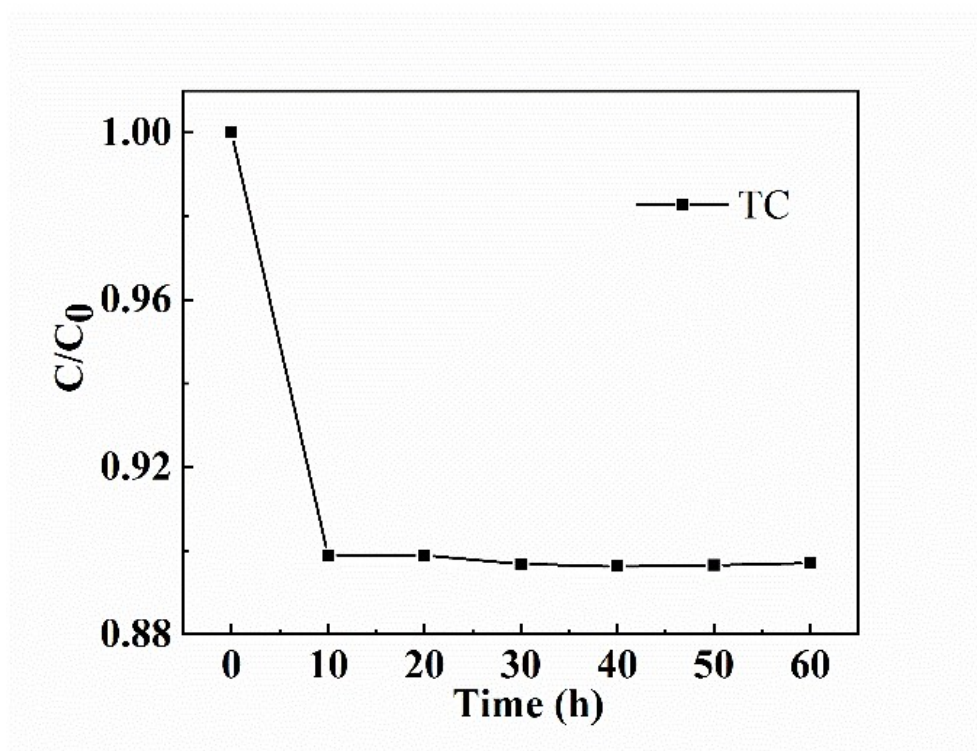

**Fig. S6.** Dependence of the TC adsorption efficiency on the  $\text{TiO}_x@Ag/AgCl$  in the dark



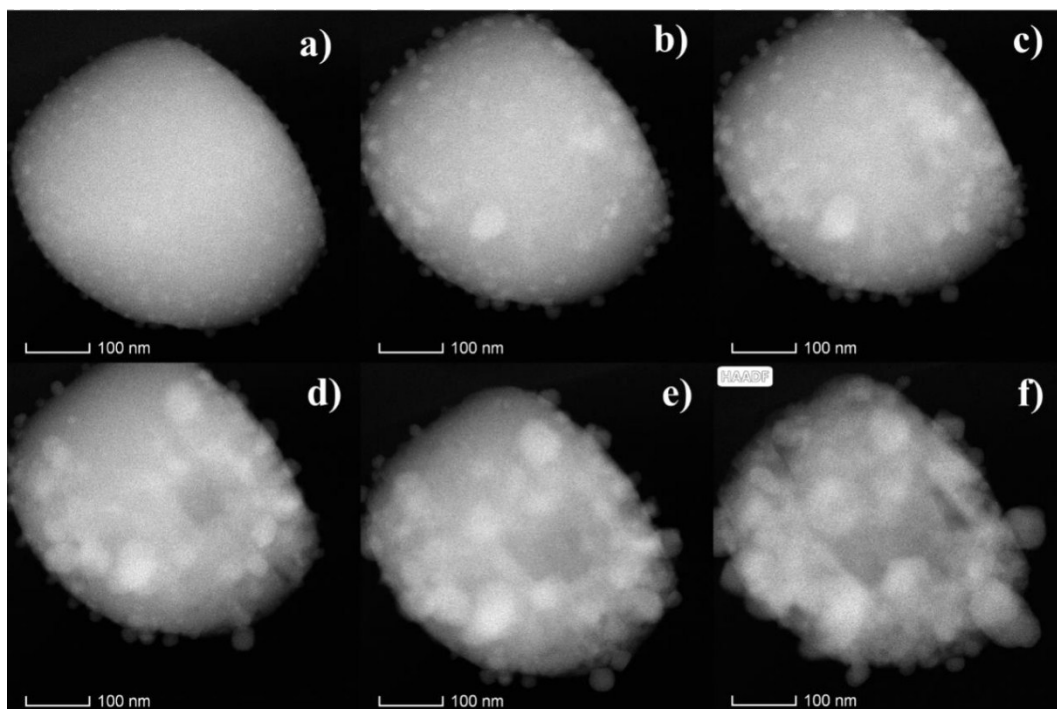

**Fig. S7.** HAADF images of  $\text{TiO}_x@Ag/AgCl$  exposed under different time of electron beam irradiation a) 0 s; b) 10 s; c) 20 s; d) 30 s; e) 40 s; f) 50 s.

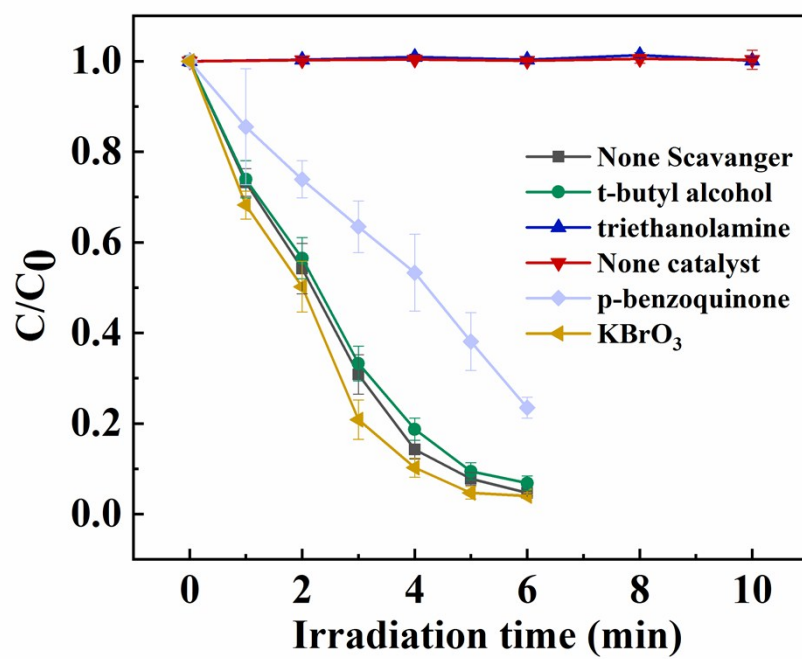

**Fig. S8.** Effect of different scavengers on photocatalytic degradation.

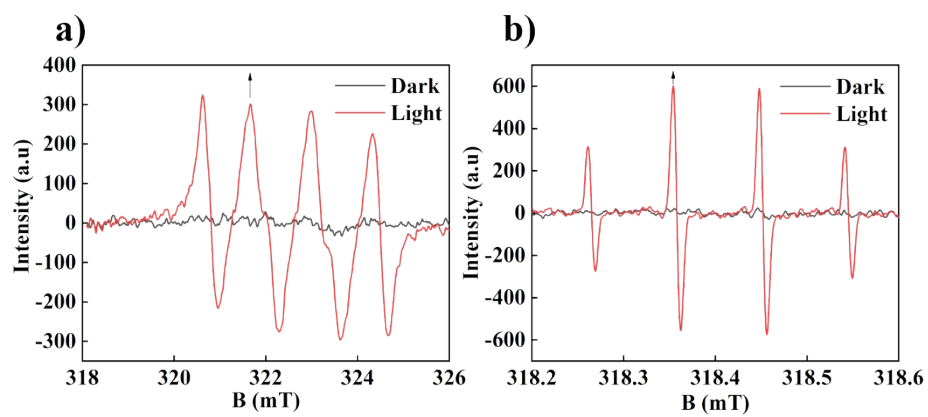

**Fig. S9.** ESR signals of DMPO-O<sub>2</sub>•<sup>-</sup> and DMPO-HO• of TiO<sub>x</sub>@Ag/AgCl.

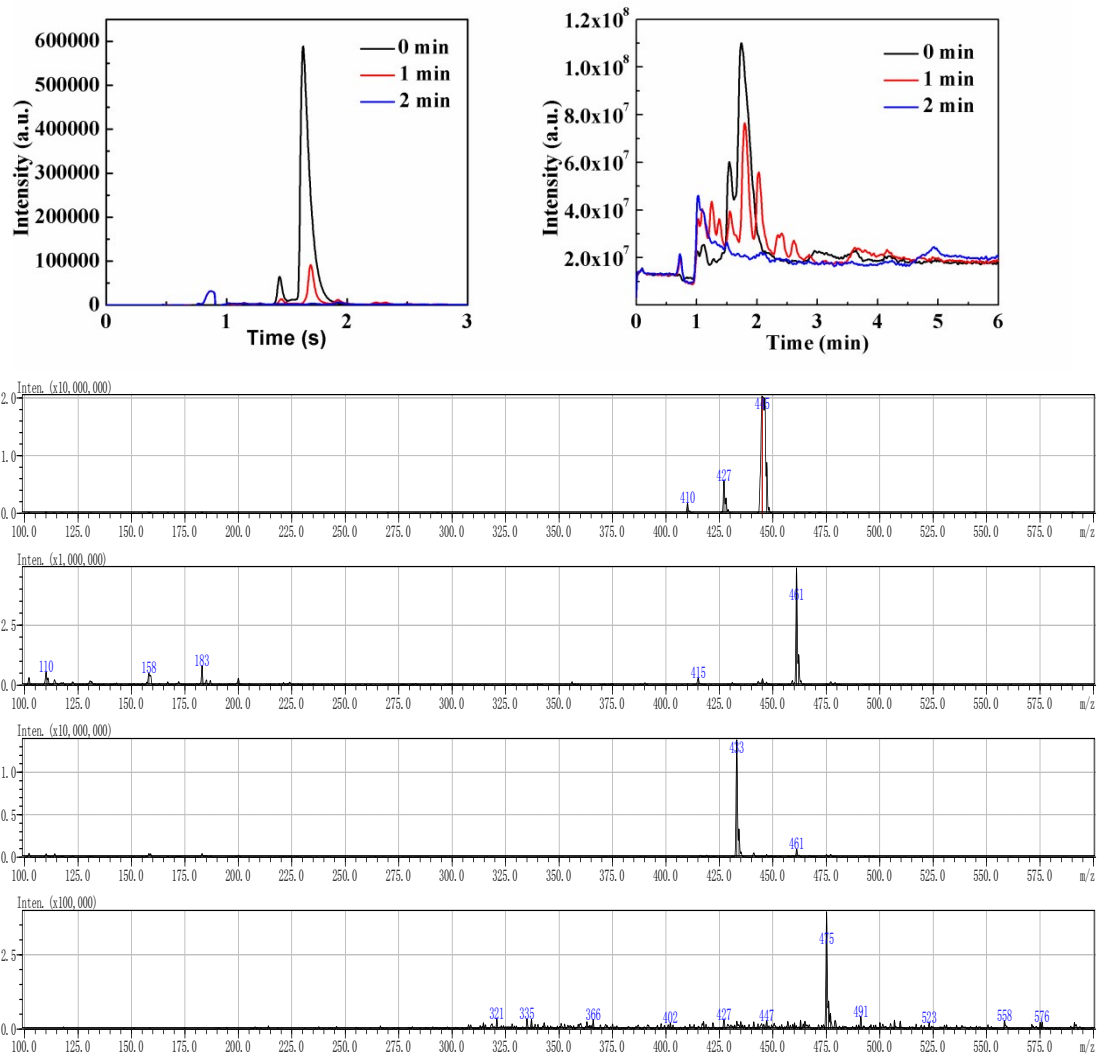

**Fig. S10.** LC-MS analysis of TC and its intermediates in the photodegradation reaction

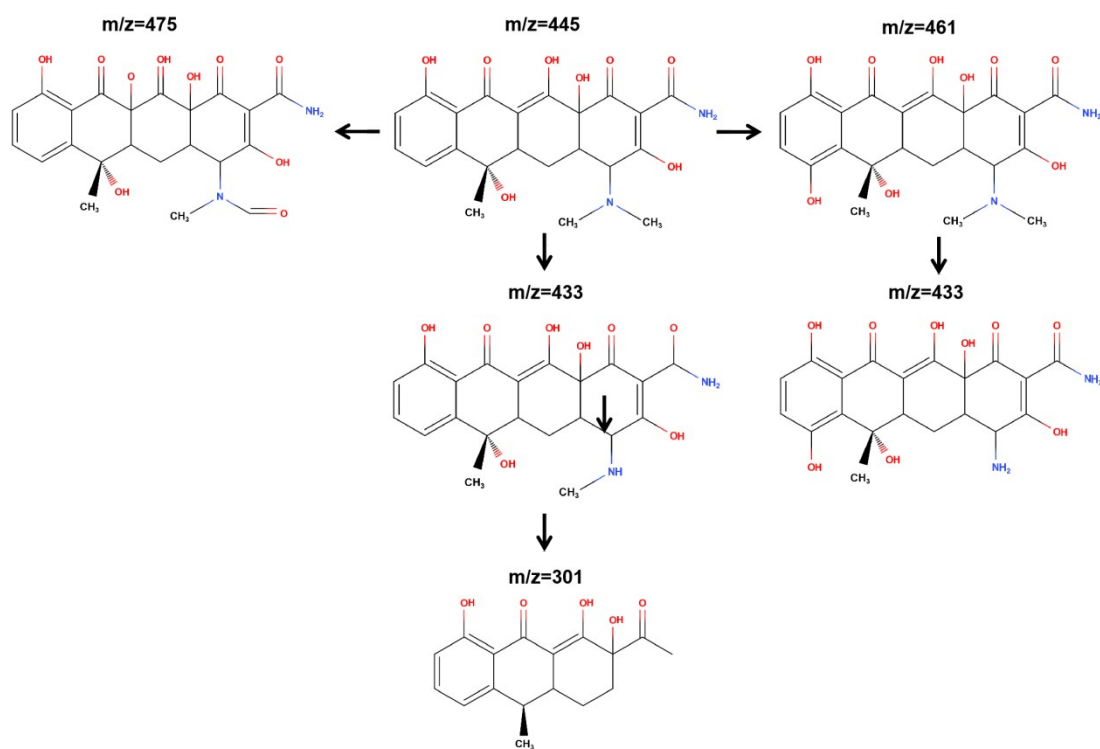

Fig. S11. Proposed possible pathways of photocatalytic degradation of TC

Table S1 EDX result of TiO<sub>x</sub>@Ag/AgCl

| Element | Atomic Fraction (%) | Mass Fraction (%) |
|---------|---------------------|-------------------|
| Ag (L)  | 49.51               | 24.89             |
| Cl (K)  | 50.09               | 0.27              |
| Ti (K)  | 0.41                | 74.84             |

Table S2 Corresponding reaction rate constant (k) of TC and MO of various catalyst

| Material structure                                                                             | Light source  | Light condition | Organic pollutants | Degradation rate          |
|------------------------------------------------------------------------------------------------|---------------|-----------------|--------------------|---------------------------|
| TiOx@Ag/AgCl (This work)                                                                       | 300 W Xe lamp | AM 1.5G         | tetracycline       | 0.49247 min <sup>-1</sup> |
| N-doped BiOIO <sub>3</sub> <sup>1</sup>                                                        | LED light     | 357 nm          | tetracycline       | 0.04025 min <sup>-1</sup> |
| BiVO <sub>4</sub> (0 4 0)-Ag@CdS <sup>2</sup>                                                  | 300W Xe lamp  | ≥420 nm         | tetracycline       | 0.0875 min <sup>-1</sup>  |
| Cu/Cl-g-C <sub>3</sub> N <sub>4</sub> <sup>3</sup>                                             | 300W Xe lamp  | ≥400 nm         | tetracycline       | 0.0271 min <sup>-1</sup>  |
| AgI/Bi <sub>2</sub> WO <sub>6</sub> <sup>4</sup>                                               | 300W Xe lamp  | ≥420 nm         | tetracycline       | 0.075 min <sup>-1</sup>   |
| CoO/g-C <sub>3</sub> N <sub>4</sub> <sup>5</sup>                                               | 300W Xe lamp  | ≥400 nm         | tetracycline       | 0.0173 min <sup>-1</sup>  |
| LDH-Ag <sub>2</sub> O/Ag <sup>6</sup>                                                          | 300W Xe lamp  | ≥420 nm         | tetracycline       | 0.0184 min <sup>-1</sup>  |
| α-Fe <sub>2</sub> O <sub>3</sub> @g-C <sub>3</sub> N <sub>4</sub> <sup>7</sup>                 | 100W LED lamp | 420 nm          | tetracycline       | 0.042 min <sup>-1</sup>   |
| Fe-doped surface-alkalinized g-C <sub>3</sub> N <sub>4</sub> <sup>8</sup>                      | 300W Xe lamp  | ≥420 nm         | tetracycline       | 0.0164 min <sup>-1</sup>  |
| Nitrogen modified titania /strontium ferrite/diatomite (N-TSD) <sup>9</sup>                    | 150W Xe lamp  | ≥400 nm         | tetracycline       | 0.0165 min <sup>-1</sup>  |
| Bi <sub>2</sub> WO <sub>6</sub> /CuBi <sub>2</sub> O <sub>4</sub> <sup>10</sup>                | 300W Xe lamp  | ≥400 nm         | tetracycline       | 0.0393 min <sup>-1</sup>  |
| NiFe <sub>2</sub> O <sub>4</sub> /C yolk-shell nanospheres <sup>11</sup>                       | 800W Xe lamp  | ≥420 nm         | tetracycline       | 0.44295 min <sup>-1</sup> |
| CQDs/ZnO@HNTs <sup>12</sup>                                                                    | 500W Xe lamp  | ≥420 nm         | tetracycline       | 0.0275 min <sup>-1</sup>  |
| carbon-doped Bi <sub>2</sub> MoO <sub>6</sub> <sup>13</sup>                                    | 300W Xe lamp  | ≥420 nm         | tetracycline       | 0.0399 min <sup>-1</sup>  |
| (Mo,C)-TiO <sub>2</sub> /FTO <sup>14</sup>                                                     | 500W Xe lamp  | ≥420 nm         | tetracycline       | 0.0221 min <sup>-1</sup>  |
| Poly (triazine imide) hollow tube (PTI)/ZnO heterojunction <sup>15</sup>                       | 300W Xe lamp  | ≥420 nm         | tetracycline       | 0.034 min <sup>-1</sup>   |
| CNT/LaVO <sub>4</sub> <sup>16</sup>                                                            | 300W Xe lamp  | ≥420 nm         | tetracycline       | 0.0098 min <sup>-1</sup>  |
| Bi <sub>2</sub> S <sub>3</sub> @Bi <sub>2</sub> WO <sub>6</sub> /WO <sub>3</sub> <sup>17</sup> | 400W Xe lamp  | ≥420 nm         | tetracycline       | 0.0168 min <sup>-1</sup>  |

|                                                                                                     |                                 |                    |              |                           |
|-----------------------------------------------------------------------------------------------------|---------------------------------|--------------------|--------------|---------------------------|
| Bi-CNNS <sup>18</sup>                                                                               | 300W Xe lamp                    | ≥420 nm            | tetracycline | 0.09458 min <sup>-1</sup> |
| PoPD/AgCl-35/CN <sup>19</sup>                                                                       | 250W Xe lamp                    | ≥420 nm            | tetracycline | 0.0375 min <sup>-1</sup>  |
| MCU-C <sub>3</sub> N <sub>4</sub> <sup>20</sup>                                                     | 300W Xe lamp                    | ≥420 nm            | tetracycline | 0.022 min <sup>-1</sup>   |
| WO <sub>3</sub> /Bi <sub>12</sub> O <sub>17</sub> Cl <sub>2</sub> <sup>21</sup>                     | 300W Xe lamp                    | ≥420 nm            | tetracycline | 0.0046 min <sup>-1</sup>  |
| QDs/BiOCl/BiOBr <sup>22</sup>                                                                       | 250W Xe lamp                    | ≥400 nm            | tetracycline | 0.0133 min <sup>-1</sup>  |
| Bi <sub>2</sub> MoO <sub>6</sub> /NiTiO <sub>3</sub> <sup>23</sup>                                  | 300W Xe lamp                    | ≥400 nm            | tetracycline | 0.0243 min <sup>-1</sup>  |
| BiVO <sub>4</sub> /N-CQDs/Ag <sub>3</sub> PO <sub>4</sub> <sup>24</sup>                             | 300W Xe lamp                    | ≥420 nm            | tetracycline | 0.07097 min <sup>-1</sup> |
| Bi <sub>2</sub> Zr <sub>2</sub> O <sub>7</sub> <sup>25</sup>                                        | Xe lamp                         | Simulated sunlight | tetracycline | 0.00868 min <sup>-1</sup> |
| Eu-CN@BiVO <sub>4</sub> <sup>26</sup>                                                               | 300W Xe lamp                    | ≥420 nm            | tetracycline | 0.06528 min <sup>-1</sup> |
| Ag <sup>0</sup> (NP)/TiO <sub>2</sub> <sup>27</sup>                                                 | UV-A lamp                       | = 360 nm           | tetracycline | 0.0112 min <sup>-1</sup>  |
| C-doped TiO <sub>2</sub> <sup>28</sup>                                                              | 25W flexible white visLED light | = 450 nm           | tetracycline | 0.0099 min <sup>-1</sup>  |
| NiS and MoS <sub>2</sub> nanosheet comodified graphitic C <sub>3</sub> N <sub>4</sub> <sup>29</sup> | Xe lamp                         | ≥400 nm            | tetracycline | 0.0254 min <sup>-1</sup>  |
| AgBr/CuBi <sub>2</sub> O <sub>4</sub> <sup>30</sup>                                                 | 300W Xe lamp                    | ≥420 nm            | tetracycline | 0.03511 min <sup>-1</sup> |
| FeNi <sub>3</sub> /SiO <sub>2</sub> /CuS <sup>31</sup>                                              | 18W UV lamp                     | = 254 nm           | tetracycline | 0.0257 min <sup>-1</sup>  |
| α-Bi <sub>2</sub> O <sub>3</sub> /g-C <sub>3</sub> N <sub>4</sub> <sup>32</sup>                     | 300W Xe lamp                    | ≥400 nm            | tetracycline | 0.01223 min <sup>-1</sup> |
| β-Bi <sub>2</sub> O <sub>3</sub> @g-C <sub>3</sub> N <sub>4</sub> <sup>33</sup>                     | 250W Xe lamp                    | ≥420 nm            | tetracycline | 0.0311 min <sup>-1</sup>  |
| CdS/SnO <sub>2</sub> <sup>34</sup>                                                                  | 300W Xe lamp                    | ≥420 nm            | tetracycline | 0.0143 min <sup>-1</sup>  |
| CdS/Bi <sub>3</sub> O <sub>4</sub> Cl <sup>34</sup>                                                 | 250W Xe lamp                    | ≥420 nm            | tetracycline | 0.0643 min <sup>-1</sup>  |
| BiOBr/CTF-3D <sup>35</sup>                                                                          | 500W Xe lamp                    | ≥420 nm            | tetracycline | 0.04122 min <sup>-1</sup> |



|                                                                                    |                 |         |              |                           |
|------------------------------------------------------------------------------------|-----------------|---------|--------------|---------------------------|
| RGO-ZnTe <sup>36</sup>                                                             | solar simulator | AM 1.5G | tetracycline | 0.033 min <sup>-1</sup>   |
| potassium (K)-doped porous ultrathin g-C <sub>3</sub> N <sub>4</sub> <sup>37</sup> | 300W Xe lamp    | ≥300 nm | tetracycline | 0.0282 min <sup>-1</sup>  |
| In <sub>2</sub> S <sub>3</sub> /BiPO <sub>4</sub> <sup>38</sup>                    | 350W Xe lamp    | ≥400 nm | tetracycline | 0.0145 min <sup>-1</sup>  |
| carbon dots/NiCo <sub>2</sub> O <sub>4</sub> <sup>39</sup>                         | 300W Xe lamp    | ≥420 nm | tetracycline | 0.02134 min <sup>-1</sup> |
| In <sub>2</sub> O <sub>3</sub> <sup>39</sup>                                       | 250W Xe lamp    | ≥420 nm | tetracycline | 0.0073 min <sup>-1</sup>  |
| Bi <sub>2</sub> WO <sub>6</sub> /Ag <sub>2</sub> O/CQDs <sup>40</sup>              | 500W Xe lamp    | ≥400 nm | tetracycline | 0.035 min <sup>-1</sup>   |

## References

- [1] L. Huang, Y. Wang, Y. Li, S. Huang, Y. Xu, H. Xu, H. Li, *Materials Letters*, **2019**, 246,219-222.
- [2] Y. Xue, Z. Wu, X. He, Q. Li, X. Yang, L. Li, *Journal of Colloid Interface Science*, **2019**, 548,293-302.
- [3] C. Li, S. Yu, X. Zhang, Y. Wang, C. Liu, G. Chen, H. Dong, *Journal of Colloid Interface Science*, **2019**, 538,462-473.
- [4] W. Xue, Z. Peng, D. Huang, G. Zeng, X. Wen, R. Deng, Y. Yang, X. Yan, *Ceramics International*, **2019**, 45,6340-6349.
- [5] J. Niu, Y. Xie, H. Luo, Q. Wang, Y. Zhang, Y. Wang, *Chemosphere*, **2019**, 218,169-178.
- [6] C.R. Chen, H.Y. Zeng, M.Y. Yi, G.F. Xiao, R.L. Zhu, X.J. Cao, S.G. Shen, J.W. Peng, *Ecotoxicology and Environmental Safety*, **2019**, 172,423-431.
- [7] T. Guo, K. Wang, G. Zhang, X. Wu, *Applied Surface Science*, **2019**, 469,331-339.
- [8] Y. Xu, F. Ge, Z. Chen, S. Huang, W. Wei, M. Xie, H. Xu, H. Li, *Applied Surface Science*, **2019**, 469, 739-746.
- [9] Q. Wu, Z. Zhang, *International Journal of Hydrogen Energy*, **2019**, 44,8261-8272.
- [10] X. Yuan, D. Shen, Q. Zhang, H. Zou, Z. Liu, F. Peng, *Chemical Engineering Journal*, **2019**, 369,292-301.
- [11] Z. Chen, Y. Gao, D. Mu, H. Shi, D. Lou, S.Y. Liu, *Dalton Trans*, **2019**, 48,3038-3044.
- [12] J. Li, K. Liu, J. Xue, G. Xue, X. Sheng, H. Wang, P. Huo, Y. Yan, *Journal of Catalysis*, **2019**, 369,450-461.
- [13] Y. Xing, X. Gao, G. Ji, Z. Liu, C. Du, *Applied Surface Science*, **2019**, 465,369-382.
- [14] X. Niu, W. Yan, C. Shao, H. Zhao, J. Yang, *Applied Surface Science*, **2019**, 466, 882-892.
- [15] X. Yan, J. Qin, G. Ning, J. Li, T. Ai, X. Su, Z. Wang, *Advanced Powder Technology*, **2019**, 30,359-365.
- [16] Y. Xu, J. Liu, M. Xie, L. Jing, H. Xu, X. She, H. Li, J. Xie, *Chemical Engineering Journal*, **2019**, 357,487497.
- [17] H. Liu, H. Zhou, H. Li, X. Liu, C. Ren, Y. Liu, W. Li, M. Zhang, *Journal of the Taiwan Institute of Chemical Engineers*, **2019**, 95, 94-102.
- [18] M. Wang, C. Jin, Z. Li, M. You, Y. Zhang, T. Zhu, *Journal of Colloid Interface Science*, **2019**, 533,513-525.
- [19] L. Sun, C. Liu, J. Li, Y. Zhou, H. Wang, P. Huo, C. Ma, Y. Yan, *Chinese Journal of Catalysis*, **2019**, 40,80-94.
- [20] Y. Shi, J. Huang, G. Zeng, W. Cheng, H. Yu, Y. Gu, L. Shi, K. Yi, Stable, metal-free, *Journal of Colloid Interface Science*, **2018**, 531,433-443.
- [21] J. Zheng, F. Chang, M. Jiao, Q. Xu, B. Deng, X. Hu, *Journal of Colloid Interface Science*, **2018**, 510,20-31.
- [22] Q. Hu, M. Ji, J. Di, B. Wang, J. Xia, Y. Zhao, H. Li, *Journal of Colloid Interface Science*, **2018**, 519,263-272.
- [23] S. Li, S. Hu, W. Jiang, Y. Liu, Y. Zhou, Y. Liu, L. Mo, *Journal of Colloid Interface Science*, **2018**, 521, 42-49.
- [24] J. Zhang, M. Yan, X. Yuan, M. Si, L. Jiang, Z. Wu, H. Wang, G. Zeng, *Journal of Colloid Interface Science*, **2018**, 529,11-22.
- [25] X. Liu, L. Huang, X. Wu, Z. Wang, G. Dong, C. Wang, Y. Liu, L. Wang, *Chemosphere*, **2018**, 210,424-432.
- [26] M. Wang, P. Guo, Y. Zhang, T. Liu, S. Li, Y. Xie, Y. Wang, T. Zhu, *Applied Surface Science*, **2018**, 453, 11-22.

- [27] A. Tiwari, A. Shukla, Lalliansanga, D. Tiwari, S.M. Lee, *Journal of Environmental Management*, **2018**, 220,96-108.
- [28] E.O. Oseghe, A.E. Ofomaja, *Journal of Environmental Management*, **2018**, 223,860-867.
- [29] X. Lu, Y. Wang, X. Zhang, G. Xu, D. Wang, J. Lv, Z. Zheng, Y. Wu, *Journal of Hazard Materials*, **2018**, 341,10-19.
- [30] F. Guo, W. Shi, H. Wang, M. Han, W. Guan, H. Huang, Y. Liu, Z. Kang, *Journal of Hazard Materials*, **2018**, 349,111-118.
- [31] N. Nasseh, L. Taghavi, B. Barikbin, M.A. Nasser, *Journal of Cleaner Production*, **2018**, 179,42-54.
- [32] D. Chen, S. Wu, J. Fang, S. Lu, G. Zhou, W. Feng, F. Yang, Y. Chen, Z. Fang, *Separation and Purification Technology*, **2018**, 193, 232-241.
- [33] Y. Hong, C. Li, B. Yin, D. Li, Z. Zhang, B. Mao, W. Fan, W. Gu, W. Shi, *Chemical Engineering Journal*, **2018**, 338, 137-146.
- [34] L. Zhang, C.-G. Niu, C. Liang, X.-J. Wen, D.-W. Huang, H. Guo, X.-F. Zhao, G.-M. Zeng, *Chemical Engineering Journal*, **2018**, 352, 863-875.
- [35] S.-R. Zhu, Q. Qi, Y. Fang, W.-N. Zhao, M.-K. Wu, L. Han, *Crystal Growth & Design*, **2017**, 18, 883-891.
- [36] K. Chakraborty, T. Pal, S. Ghosh, *ACS Applied Nano Materials*, **2018**, 1, 3137-3144.
- [37] W. Wang, P. Xu, M. Chen, G. Zeng, C. Zhang, C. Zhou, Y. Yang, D. Huang, C. Lai, M. Cheng, L. Hu, W. Xiong, H. Guo, M. Zhou, *ACS Sustainable Chemistry & Engineering*, **2018**, 6, 15503-15516.
- [38] M. Zhang, Z. Hou, W. Ma, X. Zhao, C. Ma, Z. Zhu, Y. Yan, C. Li, *New Journal of Chemistry*, **2018**, 42, 15136-15145.
- [39] J. Jiang, W. Shi, F. Guo, S. Yuan, *Inorganic Chemistry Frontiers*, **2018**, 5, 1438-1444.
- [40] J. Shen, J. Xue, G. He, J. Ni, Z. Chen, B. Tang, Z. Zhou, H. Chen, *Journal of Materials Science*, **2018**, 53, 12040-12055.
